# Supplementary figures and images for: Triple ligation-based formation of a G-quadruplex for simultaneous detection of multiple miRNAs
Source: Royal Society of Chemistry journal article supplement (doi:10.1039/d3an01103h), 2023-01-01

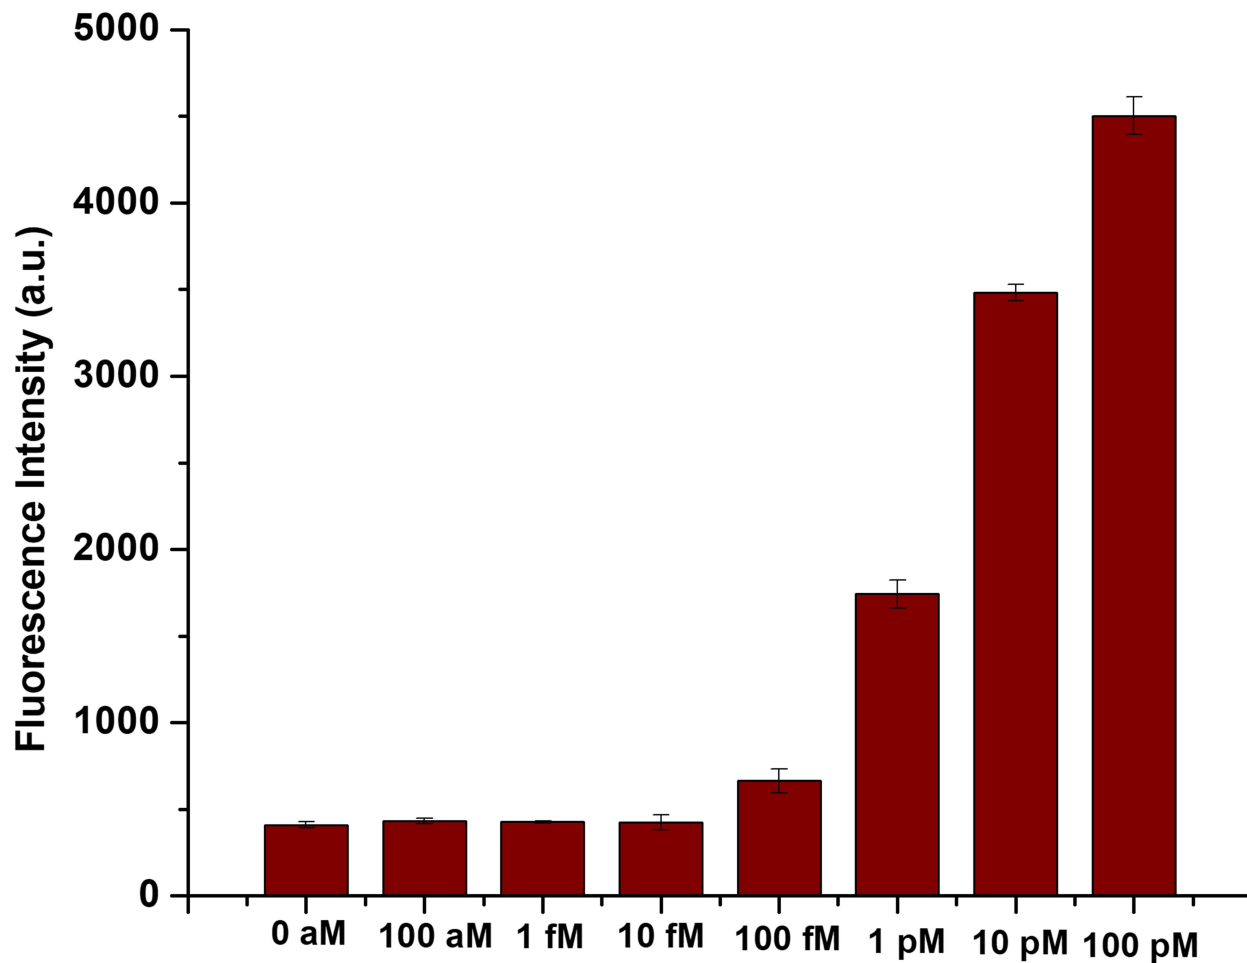

All 3 targets concentration serially diluted at a time

Supplement: d3an01103h3.pdf [file d3an01103h3.pdf]
